# Supplementary material for: Association between hypomagnesemia and mortality among dialysis patients: a systematic review and meta-analysis
Source: PeerJ. 2022 Oct 11;10:e14203. doi: 10.7717/peerj.14203 (PMC9563282; doi:10.7717/peerj.14203)
Supplement: Supplemental Information 16 [file peerj-10-14203-s016.xlsx]

## Sheet: Mortality_HR
Number	Study name	HR	Lower limit	Upper limit	Confidence level	Un/Adjust		Modality	Modality	Definition	Follow up period	Study design	High DM	Age	Male(%)	DM	KM extract
1	Ishimura (2007)	2.06	1.03	4.15	0.95	1	Adjust	HD	1	2	1	2	0	60	59.4	24	0
2	Markaki(2012)	1.16	0.34	3.96	0.95	1	Adjust	HD+PD	3	1	1	1	0	60	55	19	0
9	Matias(2014)	1.149	1.01	1.32	0.95	1	Adjust	HD	1	2	1	1	0	63.6	55	26	0
5	Fein(2014)	2.55	1.4	4.66	0.95	1	Adjust	PD	2	1	2	2	0	55	45	25	1
4	Lacson(2015)	1.6	1.3	1.96	0.95	2	Unadjust	HD	1	1	1	2	1	61.9	54	54	0
8	de Roij van Zuijdewijn(2015)	1.14	1.01	1.28	0.95	1	Adjust	HD	1	1	1	2	0	63.5	62	20.8	0
10	Garagarza(2015)	2.04	1.52	2.78	0.95	1	Adjust	HD	1	1	NR	1	NR	NR	NR	NR	0
11	Kurita(2015)	1.73	1.2	2.49	0.95	1	Adjust	HD	1	1	1	1	NR	61.7	62	NR	0
7	Li(2016)	1.17	1.05	1.3	0.95	1	Adjust	HD	1	1	2	2	1	63.3	56	59	0
12	Yang(2016)	0.97	0.81	1.15	0.95	1	Adjust	PD	2	1	2	2	1	56	55	63	0
13	Cai(2016)	0.075	0.01	0.552	0.95	1	Adjust	PD	2	1	1	2	0	58	55	22.92	0
14	Ago(2016)	2.41	1.47	4	0.95	1	Adjust	HD	1	1	1	2	1	65.86	63.2	35.3	0
16	Selim(2017)	1.14	0.44	2.89	0.95	1	Adjust	HD	1	2	2	1	0	49.74	59	17	0
19	Ye(2018)	1.53	0.98	2.39	0.95	1	Adjust	PD	2	1	1	1	0	49.3	57	21	0
17	Wu(2019)	8.3	4.26	16.19	0.95	1	Adjust	HD	1	1	2	2	NR	60.2	54	NR	0
18	Tamura(2019)	1.55	1.04	2.31	0.95	2	Unadjust	HD	1	2	1	1	1	68	65.3	47.2	1
20	Mizuiri(2019)	2.79	1.84	4.27	0.95	2	Unadjust	HD	1	1	1	2	1	68	67	40	1
22	Shimohata(2019)	2.73	1.07	6.94	0.95	1	Adjust	HD	1	2	2	2	0	58.1	62	0	0
21	Mizuiri(2020)	1.72	1	2.92	0.95	1	Adjust	HD	1	1	1	2	NR	73	67.9	NR	1
23	Lu(2020)	3.19	1.6	6.31	0.95	2	Unadjust	HD	1	1	1	1	0	50.4	57.4	14	1
Abbreviation
DM	Diabetes Mellitus
HD	hemodialysis
KM	Kaplan-Meier
NR	nor report
PD	peritoneal dialysis

## Sheet: CV_Morta_HR
Number	Study name	HR	Lower limit	Upper limit	Confidence level	Un/Adjust	Un/Adjust	Modality	Definition	Follow up period	Study design	High DM	Age	Male(%)	DM	KM
1	Ishimura (2007)	1.02	0.32	3.19	0.95	Adjust	1	1	2	1	2	0	60	59.4	24	0
3	Broek(2013)	1.56	0.95	2.56	0.95	Adjust	1	3	1	1	1	0	63	59	25	0
9	Matias(2014)	1.22	0.72	2	0.95	Adjust	1	1	2	1	1	0	63.6	55	26	0
8	de Roij van Zuijdewijn(2015)	1.37	1.18	1.61	0.95	Adjust	1	1	1	1	2	0	63.5	62	20.8	0
13	Cai(2016)	0.013	0.001	0.155	0.95	Adjust	1	2	1	1	2	0	58	55	22.92	0
19	Ye(2018)	1.43	0.8	2.56	0.95	Adjust	1	2	1	1	1	0	49.3	57	21	0
18	Tamura(2019)	1.698	0.8767	3.2886	0.95	Unadjust	2	1	2	1	1	1	68	65.3	47.2	1
20	Mizuiri(2019)	3.73	2.07	6.98	0.95	Unadjust	2	1	1	1	2	1	68	67	40	0
23	Lu(2020)	3.69	1.53	8.88	0.95	Unadjust	2	1	1	1	1	0	50.4	57.4	14	1
Abbreviation
DM	Diabetes Mellitus
HD	hemodialysis
KM	Kaplan-Meier
PD	peritoneal dialysis

## Sheet: Morta_Subgroup
	HR	Lower	Higher
Overall	1.672	1.412	1.98
Adjust/Unadjust
Adjust	1.57	1.307	1.885
Unadjust	2.022	1.437	2.846
Modality
HD	1.802	1.484	2.188
PD	1.262	0.835	1.908
Definition
<=2.5 mg/dl	1.742	1.417	2.141
> 2.5 mg/dl	1.51	1.027	2.095
Follow up period
<= 5 years	1.626	1.299	2.034
> 5 years	1.754	1.25	3.249
Study design
Prospective	1.61	1.209	2.144
Retrospective	1.736	1.378	2.187
KM extract
No	1.518	1.272	1.813
Yes	2.202	1.587	3.055
Abbreviation
HD	hemodialysis
KM	Kaplan-Meier
PD	peritoneal dialysis

## Sheet: CV_Morta_Subgroup
	HR	Lower	Higher
Overall	1.574	1.096	2.262
Adjust/Unadjust
Adjust	1.351	1.178	1.549
Unadjust	2.795	1.876	4.164
Modality
HD	1.837	1.101	3.065
PD	0.661	0.218	2.004
Definition
<=2.5 mg/dl	1.683	1.034	2.74
> 2.5 mg/dl	1.322	0.655	2.669
Study design
Prospective	1.572	1.208	2.045
Retrospective	1.424	1.227	1.653
KM extract
No	1.419	1.241	1.622
Yes	2.247	1.325	3.812
Abbreviation
HD	hemodialysis
KM	Kaplan-Meier
PD	peritoneal dialysis
